# Supplementary material for: A DNA/HDAC dual-targeting drug CY190602 with significantly enhanced anticancer potency
Source: PubMed Central journal article supplement (PMC4403045; doi:10.15252/emmm.201404580), 2015-03-10
Supplement: emmm0007-0438-sd1.pdf [file emmm0007-0438-sd1.pdf]

## Supplementary information

### Table of contents

#### 1. Supplementary Tables

- i. **Table S1** List of DNA repair genes analyzed by qPCR.
- ii. **Table S2** List of the qPCR primers for the analyzed DNA repair genes.
- iii. **Table S3** List of shRNA target sites of indicated genes.
- iv. **Table S4** List of qPCR primers used for analyzing shRNA knockdown efficiency.

#### 2. Supplementary Figures and Legends

- i. **Figure S1** HDAC inhibition by CY and Cpd A, but not bendamustine in H1650 cells. The HDAC inhibitor SAHA were used as positive control. Cells were treated at indicated drug concentration for 8hrs before collecting samples.
- ii. **Figure S2** Dose response curve of bendamustine, CY, Cpd A and Cpd B in H1650 cells. Cells were treated for 48hrs before MTT assay.
- iii. **Figure S3** ShRNA mediated suppression of Cbp at protein level.
- iv. **Figure S4** Suppression of CBP, Tip60, MORF and MSL1 did not affect cell viability without drug treatment. Data represent mean±SEM, from three independent experiments.
- v. **Figure S5** HDAC inhibition resulted in suppression of EP300 and TYMS. Cells were treated for 6hrs before mRNA collection and qPCR analysis. Data represent mean±SEM, from three independent experiments. \*p < 0.1, \*\*p < 0.05, \*\*\*p < 0.01.
- vi. **Figure S6** Suppression of EP300 and TYMS caused reduced viability of cancer cells. Retrovirus that encodes GFP and indicated shRNAs were used to infect cells to achieve 30-60% infection rate, and percentages of GFP positive, shRNA-expressing cells were followed

overtime. shRNAs that significantly impairs cell growth such as sh EP300 and sh TYMS showed rapid loss of GFP positive cells overtime.

**Table S1** List of DNA repair genes analyzed by qPCR.

| <b>ATR-CHK1<br/>SIGNALING</b> | <b>FA pathway</b> | <b>TLS<br/>pathway</b> | <b>HR pathway</b> | <b>Nucleotide<br/>synthesis<br/>and others</b> |
|-------------------------------|-------------------|------------------------|-------------------|------------------------------------------------|
| ATR                           | FAN1              | POLI                   | ATM               | ADSS                                           |
| ATRIP                         | FANCA             | POLK                   | BLM               | APEX1                                          |
| CBP                           | FANCB             | POLN                   | BRCA1             | CTPS                                           |
| CHK1                          | FANCC             | RAD18                  | BRCA2             | DHFR                                           |
| CLASPIN                       | FANCD2            | REV1                   | CHK2              | EME1                                           |
| RPA1                          | FANCE             | REV3                   | MRE11             | ERCC4                                          |
| TOPBP1                        | FANCF             | REV7                   | NBS1              | EXO1                                           |
| EP300                         | FANCG             |                        | RAD50             | GMPS                                           |
|                               | FANCJ             |                        | RAD51             | MORF                                           |
|                               | FANCL             |                        | RAD51B            | MSL1                                           |
|                               | FANCM             |                        | RAD51C            | MUS81                                          |
|                               |                   |                        | RAD51D            | PARP1                                          |
|                               |                   |                        | RAD52             | PCNA                                           |
|                               |                   |                        | RAD54L            | RRM1                                           |
|                               |                   |                        | RAD54L2           | RRM2                                           |
|                               |                   |                        | RECQ              | TYMS                                           |
|                               |                   |                        |                   | TIP60                                          |

**Table S2** List of the qPCR primers for the analyzed DNA repair genes.

| Gene        | Forward               | Reverse              |
|-------------|-----------------------|----------------------|
| hATR-RT     | CTGAACACGGACATGTGGAC  | GAAAAGGAATGGCTTGCAGA |
| hATRIP-RT   | GAGTGCTCACGTGATGGAGA  | TGTACAAGGGGGAGGAAATG |
| hCBP-RT     | CCGGAAGATGCATCAGATT   | TCTTTTCGAGGTCTGCCAGT |
| hCHK1-RT    | TACTGCAACCTCCGTCTCCT  | AAACCTAGCCAGGTGTGGTG |
| hCLASPIN-RT | ATGCTTCCCAGATGGACTTG  | CTCGTTCAATTCGCTCCTTC |
| hRPA1-RT    | CATCGGTAGGCAAAGGAAAA  | CTGAAGGCAGAGGGAGTGAC |
| hTOPBP1-RT  | AAGGAGCCCTCGTTACACCT  | AGTTTCCAAGGCTGCAAGTG |
| hEP300-RT   | GATGAGAGCAACAACCAGCA  | GCATGGACCAGAGACTGGAT |
| hFAN1-RT    | CAGGGCAGGTTGGCTTAATA  | TTTGTCTTTGGTGGTGGTGA |
| hFANCA-RT   | TAGGCTCTGCTTTGCAGGAT  | GATCTGTCCCACGCTAGAGG |
| hFANCB-RT   | TGGATTCAGGTGGAGGAAAC  | TTTCCCATTTAGCAGCAACC |
| hFANCC-RT   | CACTGGCTCCAGACACTGAA  | CAGGAACCAGCTCTCAAAGG |
| hFANCD2-RT  | CCTGAGCTGCTTTTCTTGCT  | CGGCTTCCTTTGTCTTGAG  |
| hFANCE-RT   | GTGGAGATGACCCCTGAGAA  | GTCAGCATGAGCTTGGCATA |
| hFANCF-RT   | TCTGACTCAGCTCCCAAGT   | TGGTGAAACCCCGTCTCTAC |
| hFANCG-RT   | GTACACAGCACTGGGGTCTT  | CAGGCTGATCCCTCTTTCAG |
| hFANCJ-RT   | CAGATCCACAAGCCCAACTT  | CAGGTGTTGCCTTCGGTATT |
| hFANCL-RT   | CCTGGGAATTAAGCTGAGCA  | AGGATAGCACGAGCTGGAAA |
| hFANCM-RT   | CACGAAGGGTTTTACCCAGA  | ACCTTCTTCACCCACACAGG |
| hPOLI-RT    | CCAGGGTGGGGAGTTAAAGT  | CTTGCCTTTCTGGTGTCCAT |
| hPOLK-RT    | AGGGCATTGCTTTCTCTCCT  | CTCTCTCCATCCCTCGTCAG |
| hPOLN-RT    | GCAAACCAAGAAGGTGGTGT  | CTGGGCAGCTTCCTGAATAG |
| hRAD18-RT   | GCCAGATGCTTCCAGAGTTC  | ATGTGTTTGGGTTGGGTGAT |
| hREV1-RT    | TGCTCACCCTCCACTGTTC   | GTTTGGATGGCACTGAAGGT |
| hREV3-RT    | AGCCTCATGAAGCGCATATT  | GCTTTTCGGAAGTTGACAGC |
| hREV7-RT    | GTGGAGAAAGTGGTGGTGGT  | CGAGTCTGAGCTGATGGACA |
| hATM-RT     | AGGCCAAATGATTTCAAGTGC | TTGGCAAACATCCATGAAGA |
| hBLM-RT     | CGAAATCCTCCAGCATCATT  | GGAGCCATAATCCCCAATTT |
| hBRCA1-RT   | TCATGCCAGCTCATTACAGC  | TAAGCCAGGCTGTTTGCTTT |
| hBRCA2-RT   | AGGCTTCAAAAAGCACTCCA  | GTGCGAAAGGGTACACAGGT |
| hCHK2-RT    | CAAGGCTCCTCCTCACAGTC  | AAGGAGCTCAGTGTCCAGA  |
| hMRE11-RT   | CCCGTAGCAGGAACTCAAAG  | GGGAAGGCTGCTGTCTTGTA |
| hNBS1-RT    | AATGGCTTTTCCCGAACTTT  | CAAGAAGAGCATGCAACCAA |
| hRAD50-RT   | TTGGATGAGCCAACAACAAA  | CCAGAAGCTGGAAGTTACGC |
| hRAD51-RT   | GGTGAAGGAAAGGCCATGTA  | CATCACTGCCAGAGAGACCA |
| hRAD51B-RT  | AAGATGCAAACGGCTTATGG  | CTTCGTCCAAAGCAGAAAGG |
| hRAD51C-RT  | AGACGTTCCGCTTTGAAATG  | GGAGTTCCTCAGCAGTCTGG |
| hRAD51D-RT  | GCGGCAAACTCAGGTATGT   | CAGCCCTCCATTGGAATCTA |
| hRAD52-RT   | TGGGACTGAGGAAGCAATTC  | TGGCCTGGTACTCTTCTGCT |
| hRAD54L-RT  | CTGCCTGTGAAGATTGAGCA  | CCCTCAAGCAATTCTTCTGC |

|             |                       |                        |
|-------------|-----------------------|------------------------|
| hRAD54L2-RT | GTTTGAACGCCCTATCCTGA  | CAAAGCCCTCCAGAAGACTG   |
| hRECQ4-RT   | GGGTGCTTGTGGAGTTCAGT  | CACACGGCCATAGAGGAAGT   |
| hADSS-RT    | TGGTGCCTTTCCTACAGAGC  | CCAACCAGCCACATCTTCTT   |
| hAPEX1-RT   | CAAACCTGCCACACTCAAGA  | CTGGGGCTTCTTCCTTTACC   |
| hCTPS-RT    | TCTACCGAGTCCCTTGTTG   | TTTCTTGGCTGCCTCTCAAT   |
| hDHFR-RT    | CCTGGTTCCTCATTCTGAG   | CTCCTTGTGGAGGTTCTTG    |
| hEME1-RT    | TGTCAGCTTCCAGCCTACCT  | CTCGGCTTGGTTTTCTTCTG   |
| hERCC4-RT   | CTGGAAGTCTCGACACTGA   | GCAGTGCAGCTGGAGAAAGT   |
| hEXO1-RT    | AGCTTGGGGATGTATTCACG  | TGCCTTTGCTAATCCAATCC   |
| hGMPS-RT    | CTGGATGCTGGTGCTCAGTA  | AAATGCTGGTGTTTCCAAGG   |
| hMORF-RT    | GACCGCAGTACAGGGTCAAT  | TCATGGGGTAGAAGGCTGAC   |
| hMSL1-RT    | CCCATCACCGTTACCATTACG | GGAACAGCCAAGACTGAAGTTT |
| hMUS81-RT   | AGAAGTTGGCCGAGTCAGAA  | AAGCTCTGCTGAAGCTGCTC   |
| hPARP1-RT   | GGAAGCTGGAGGAGTGACAG  | CTTGGCATACTCTGCTGCAA   |
| hPCNA-RT    | AGGTGTTGGAGGCACTCAAG  | CAAAGAGACGTGGGACGAGT   |
| hRRM1-RT    | CCTGGGGCATTGCTATTTA   | GCTGCTCTTCCTTTCTGTG    |
| hRRM2-RT    | CTGGCTCAAGAAACGAGGAC  | TCAGGCAAGCAAAATCACAG   |
| hTYMS-RT    | CCAAAGCTCAGGATTCTTCG  | AGTTGGATGCGGATTGTACC   |
| hTIP60-RT   | AATGTGGCCTGCATCCTAAC  | TGTTTTCCCTTCCACTTTGG   |

---

**Table S3** List of shRNA target sites of indicated genes.

| <b>Gene</b> | <b>Hairpin sequences</b> |
|-------------|--------------------------|
| Tip60-1     | ACCGAAAGCTTTTCTATGTCC    |
| Tip60-2     | CCCCAACCACCGCTCAACGAA    |
| Tip60-3     | ATACAAGGGCCAGTATATCCT    |
| Tip60-4     | CACCGAAGTTACTGGTCCCAA    |
| Cbp-1       | AAGGGATGAATACTATCATTT    |
| Cbp-2       | CATGGACCTTTCTACCATCAA    |
| Cbp-3       | AAAGGCGTGTATACATATCTT    |
| Cbp-4       | ACCCAAGTGAAGGAGATGACT    |
| Myst4-1     | CCCCATGGGTTGGACAAGAAA    |
| Myst4-2     | CAAGCTGTACATTTTAACATA    |
| Myst4-3     | ACACGGACTTTAACGATGCAA    |
| Myst4-4     | CCACACAGACCAAAGTCCTCA    |
| Msl1-1      | ACAGGTTGGAGATCCAGAAGA    |
| Msl1-2      | CCAGCGAGGATGTAGAGAGAA    |
| Msl1-3      | CCCCATTTGGAAATACAGAA     |
| Msl1-4      | ACAGAGTTGTCTGAGAAAATT    |

**Table S4** List of qPCR primers used for analyzing shRNA knockdown efficiency.

| <b>Gene</b> | <b>Forward</b>          | <b>Reverse</b>           |
|-------------|-------------------------|--------------------------|
| MYST4-RT-1  | GGAAGAGCGAGAAGCTGAGA    | TTGCAGACGATTGCCTACTG     |
| MYST4-RT-2  | GTGCTTTTCCGTCCTCACTCC   | CACGATTTGACTCTTTAGTCCCC  |
| MSL1-RT-1   | TGCTGATTACCCCCTTCTTG    | CTACAGGTCCGGTGAGGTGT     |
| MSL1-RT-2   | TCCCCAACTGGGCAGAATC     | GACAGCGGTGATGATAACAGG    |
| TIP60-RT-1  | TCCCGGTCCAGATCACACTC    | ACCTTCCGTTTCGTTGAGCG     |
| TIP60-RT-2  | GGGGAGATAATCGAGGGCTG    | TCATCCAGACGTTTGTGAAGTC   |
| CREBBP-RT-1 | GGCTTCTCCGCGAATGACAA    | GTTTGGACGCAGCATCTGGA     |
| GAPDH-RT    | CCTGGAGAAACCTGCCAAGTATG | AGAGTGGGAGTTGCTGTTGAAGTC |

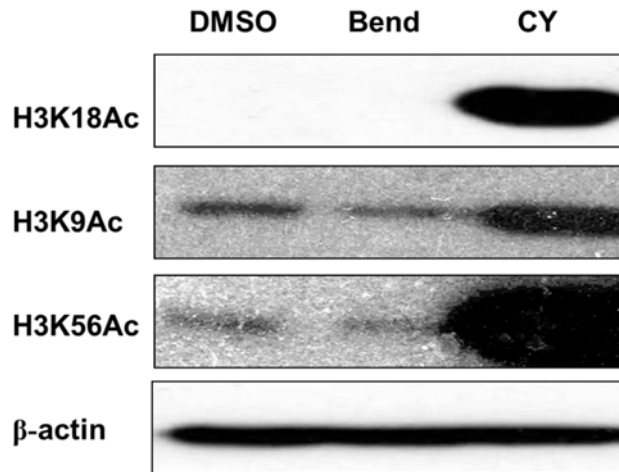

**Figure S1** HDAC inhibition by CY and Cpd A, but not bendamustine in H1650 cells. The HDAC inhibitor SAHA were used as positive control. Cells were treated at indicated drug concentration for 8hrs before collecting samples.



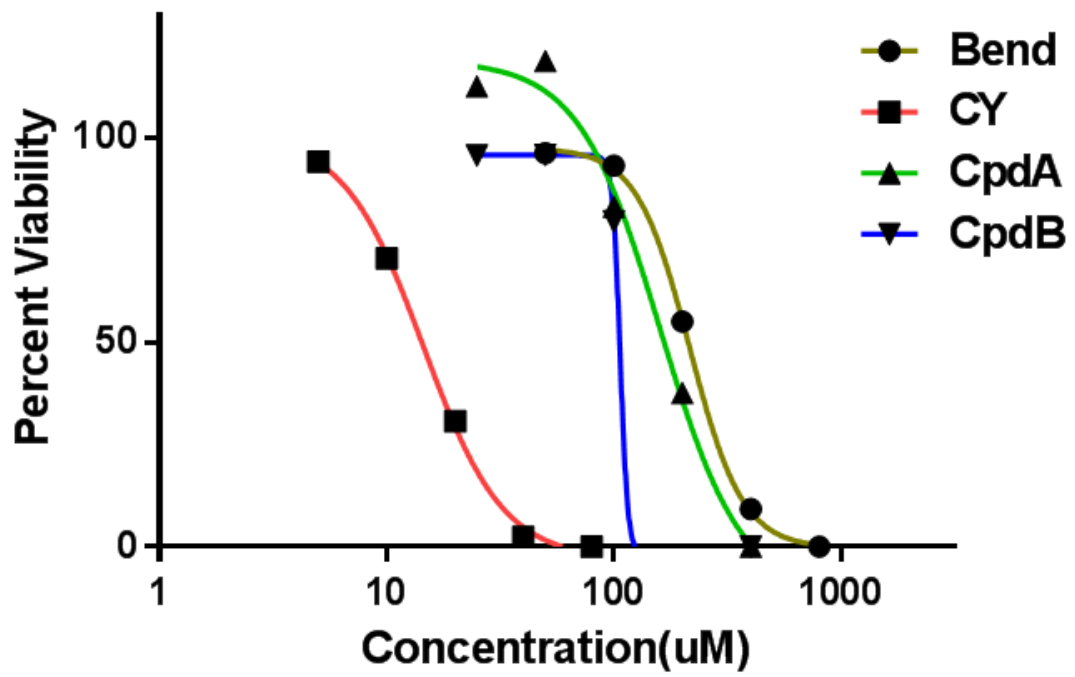

**Figure S2** Dose response curve of bendamustine, CY, Cpd A and Cpd B in H1650 cells. Cells were treated for 48hrs before MTT assay.

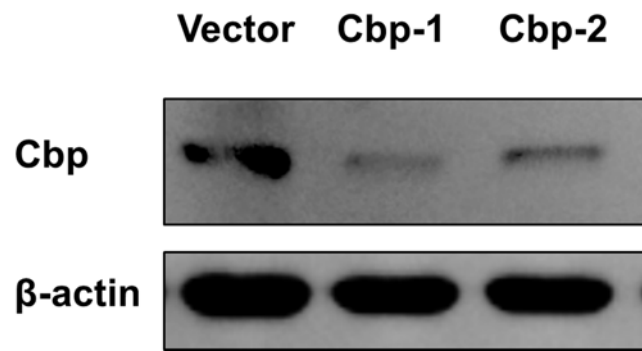

**Figure S3** ShRNA mediated suppression of Cbp in Myc Arf<sup>-/-</sup> cells at protein level.

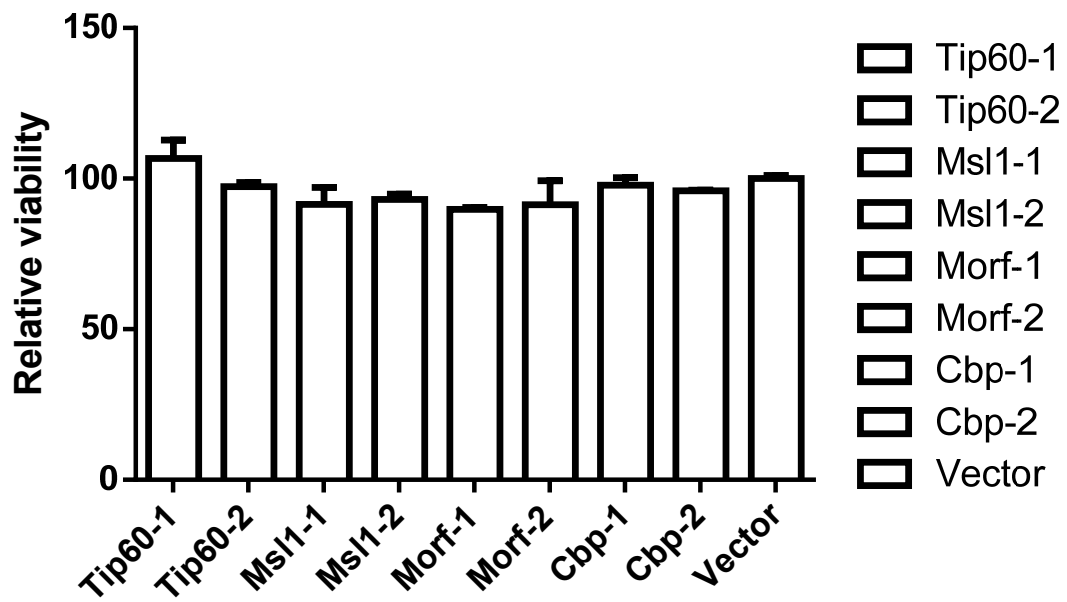

**Figure S4** Suppression of CBP, Tip60, MORF and MSL1 don't induce cell death without drug treatment. GFP percentage of Cells infected with shRNA were examined for at least 72h, and relative viability were calculated by similar formula for relative resistance index. Data represent mean $\pm$ SEM, from at least two independent experiments. All shRNA groups show no significant different from vector control.

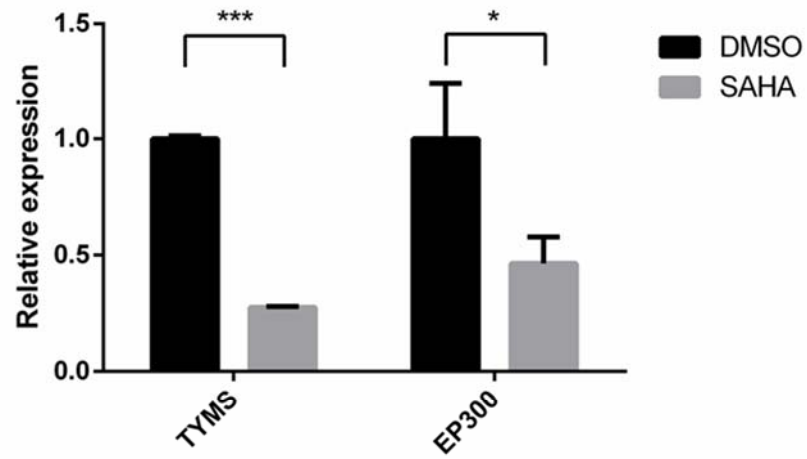

**Figure S5** HDAC inhibition resulted in suppression of EP300 and TYMS. Cells were treated for 6hrs before mRNA collection and qPCR analysis. Data represent mean $\pm$ SEM, from three independent experiments. \* $p < 0.1$ , \*\* $p < 0.05$ , \*\*\* $p < 0.01$ .

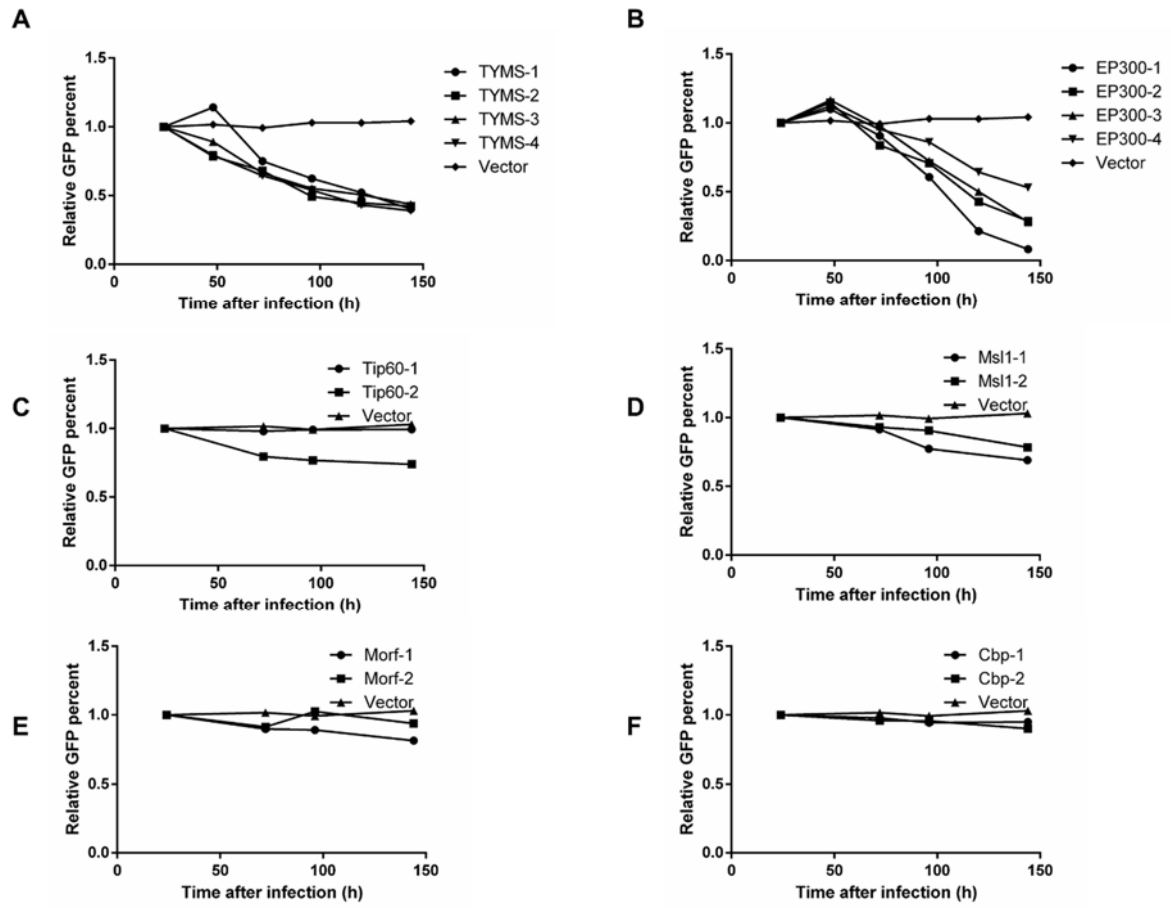

**Figure S6** Suppression of EP300 and TYMS caused reduced viability of cancer cells. Retrovirus that encodes GFP and indicated shRNAs were used to infect cells to achieve 30-60% infection rate, and percentages of GFP positive, shRNA-expressing cells were followed overtime. shRNAs that significantly impairs cell growth such as shEP300 and shTYMS showed rapid loss of GFP positive cells overtime.
