# Supplementary material for: A DNA/HDAC dual-targeting drug CY190602 with significantly enhanced anticancer potency
Source: PubMed Central journal article supplement (PMC4403045; doi:10.15252/emmm.201404580), 2015-03-10

## Figure S3

WB: Cbp

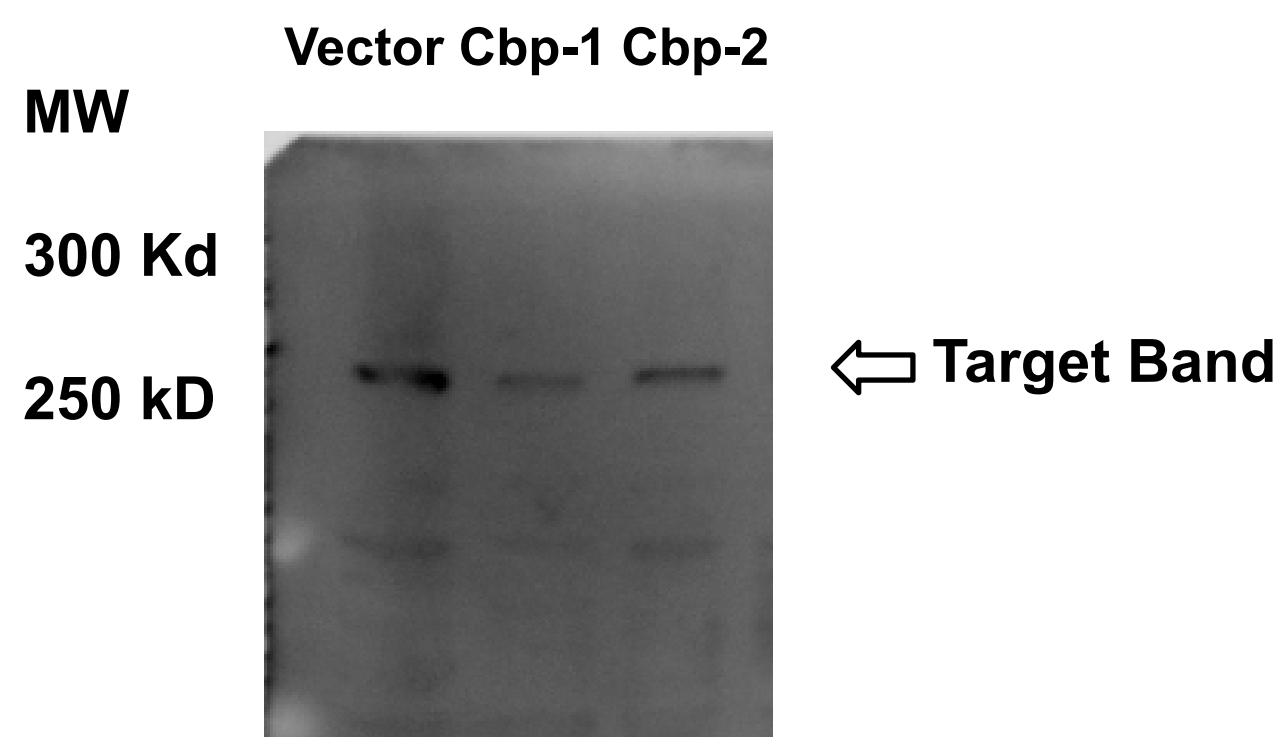

WB:  $\beta$ -actin

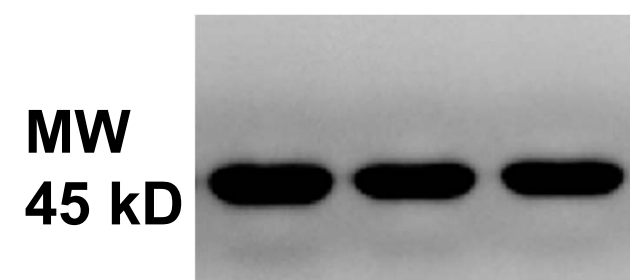

Supplement: emmm0007-0438-sd2.pdf [file emmm0007-0438-sd2.pdf]
