# Supplementary material for: A DNA/HDAC dual-targeting drug CY190602 with significantly enhanced anticancer potency
Source: PubMed Central journal article supplement (PMC4403045; doi:10.15252/emmm.201404580), 2015-03-10

Figure 1D

WB:  $\gamma$ -H2AX

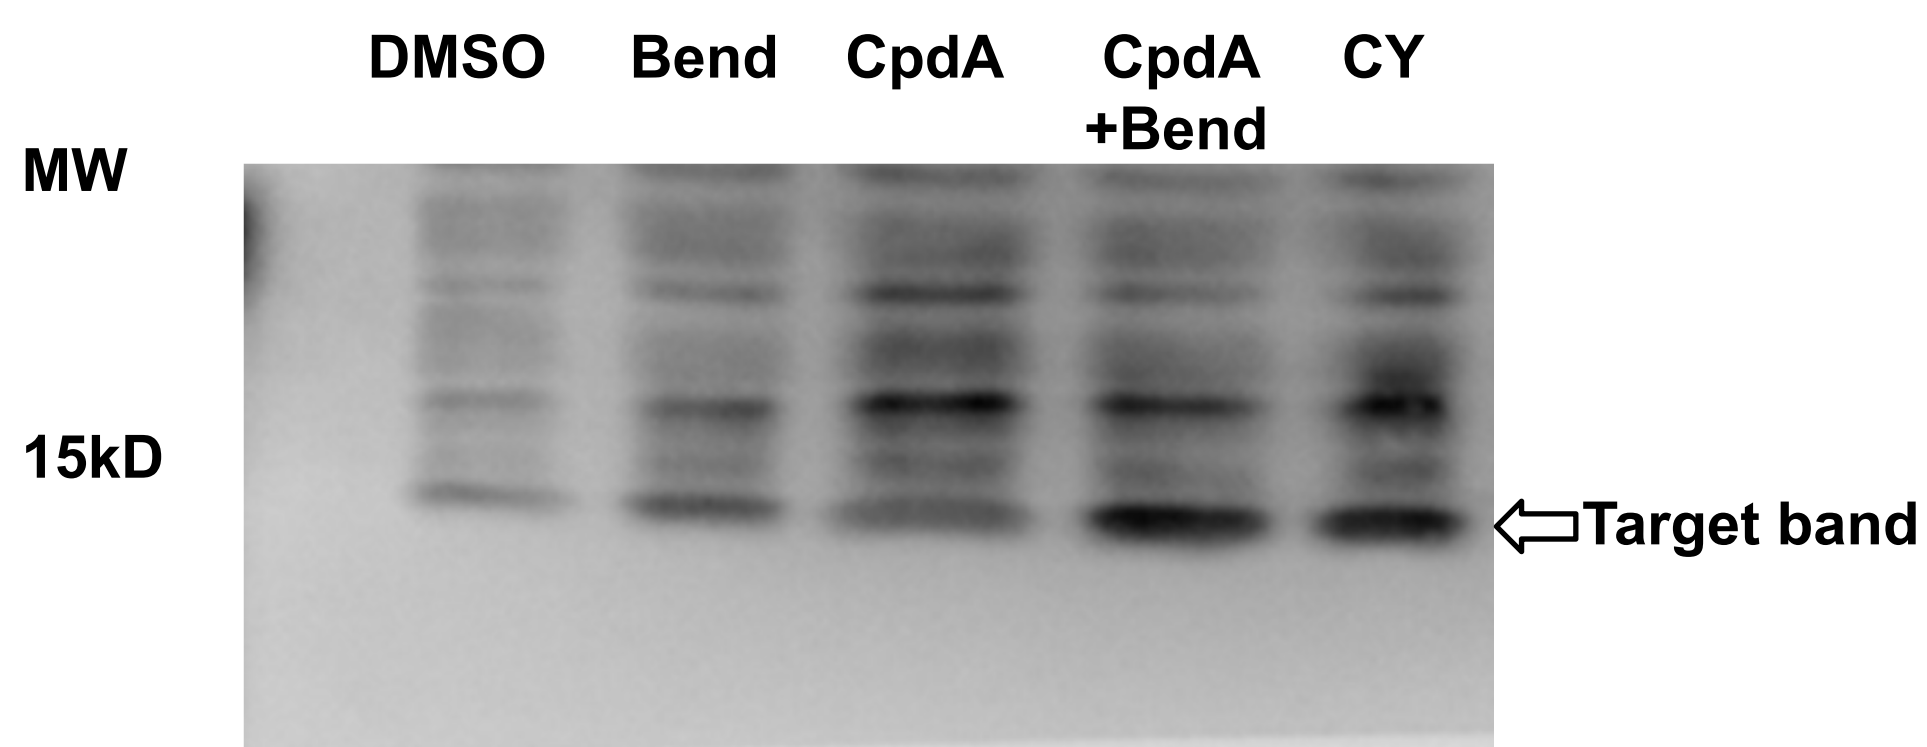

WB:  $\beta$ -actin

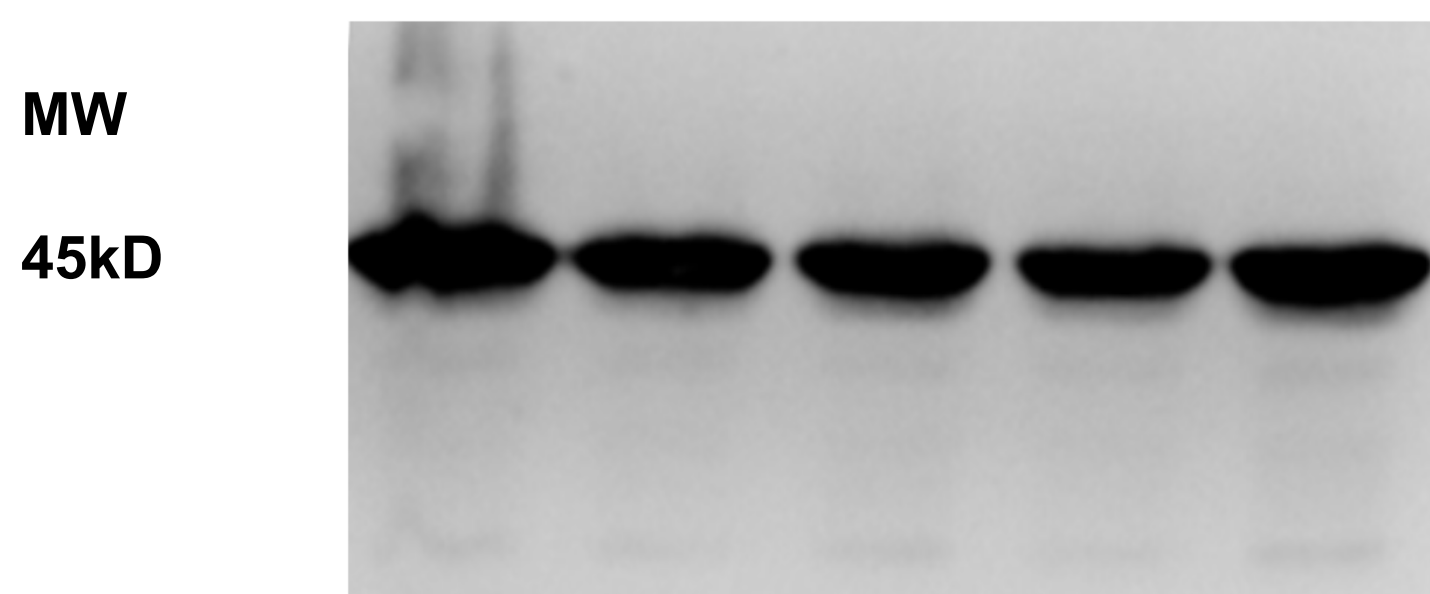

Supplement: emmm0007-0438-sd4.pdf [file emmm0007-0438-sd4.pdf]
