# Supplementary material for: A DNA/HDAC dual-targeting drug CY190602 with significantly enhanced anticancer potency
Source: PubMed Central journal article supplement (PMC4403045; doi:10.15252/emmm.201404580), 2015-03-10

**Figure 2B**

**WB:H3K18Ac**

**DMSO CY CpdA CpdB Bend SAHA**

**MW**

**15kD**

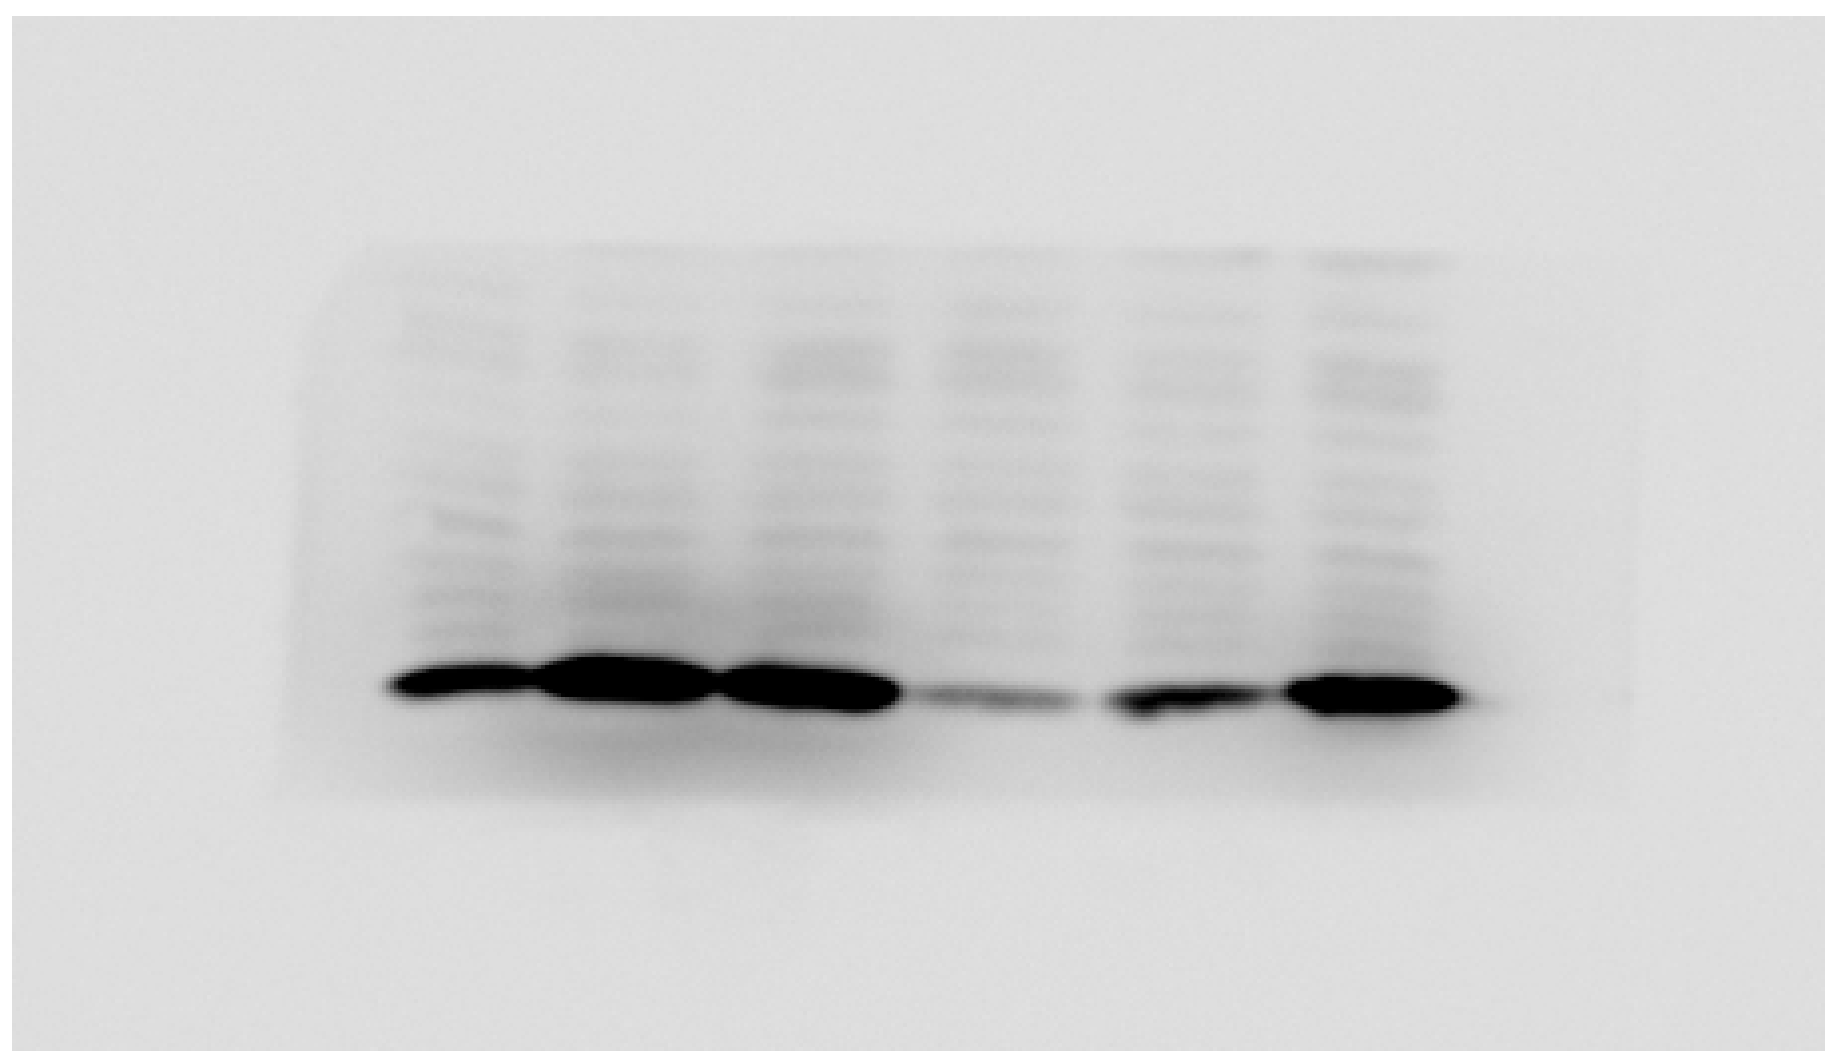

**WB:  $\beta$ -actin**

**MW**

**45kD**

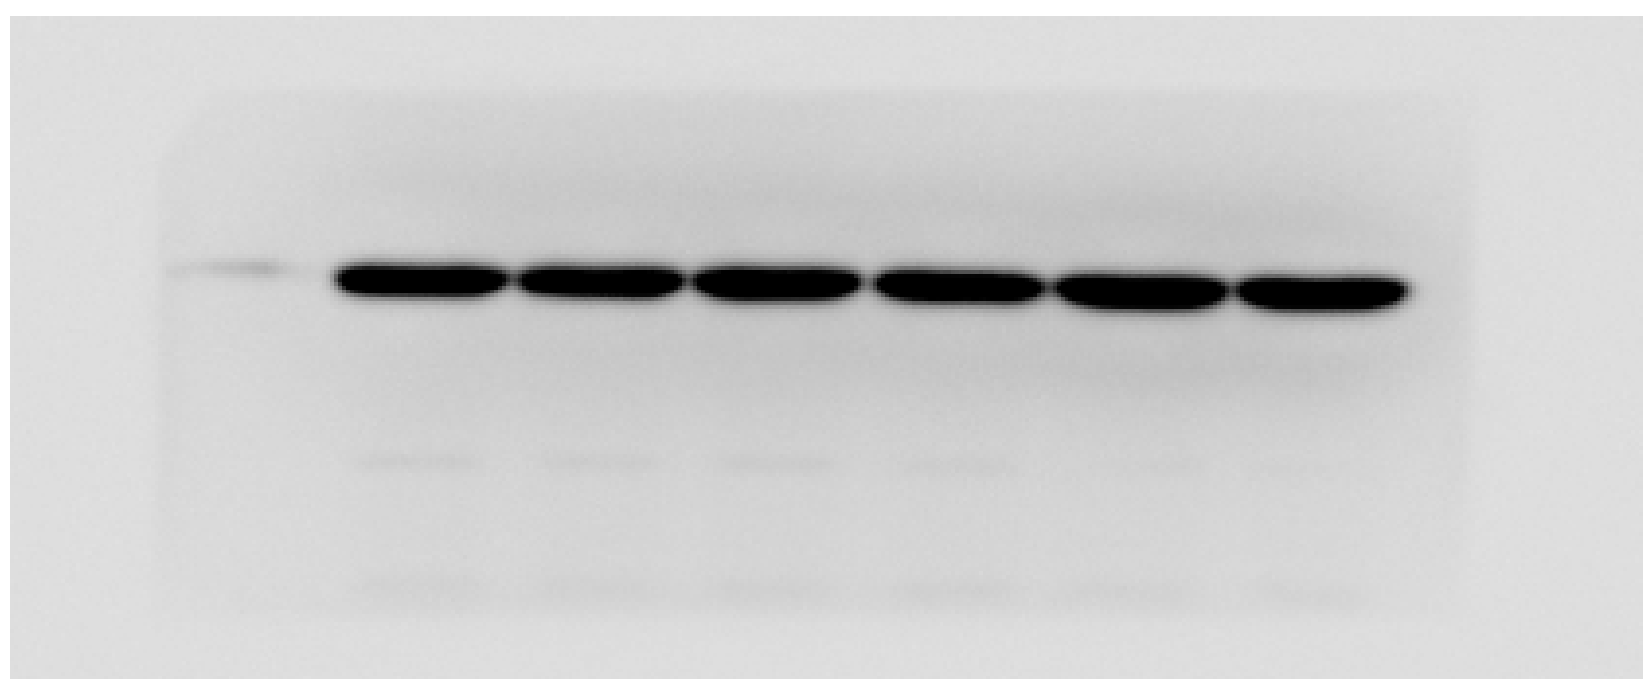

Supplement: emmm0007-0438-sd5.pdf [file emmm0007-0438-sd5.pdf]
